# Supplementary material
Source: PubMed Central journal article supplement (PMC6145666)
Supplement: jamasurg-153-409-s001.pdf [file jamasurg-153-409-s001.pdf]

## Supplementary Online Content

Gardner AK, Dunkin BJ. Evaluation of validity evidence for personality, emotional intelligence, and situational judgment tests to identify successful residents. *JAMA Surg.* Published online December 27, 2017. doi:10.1001/jamasurg.2017.5013

**eAppendix 1.** The Four Branch Model of Emotional Intelligence

**eAppendix 2.** Content of the Six Factor Personality Questionnaire

**eAppendix 3.** Example of Item in Which Trainee Ranks Appropriateness of Responses

This supplementary material has been provided by the authors to give readers additional information about their work.

## eAppendix 1. The Four Branch Model of Emotional Intelligence

| Branch Name                           | Brief Description of Skills Involved                                                                                                                          | Measurement Approach                                                                                                                                                     |
|---------------------------------------|---------------------------------------------------------------------------------------------------------------------------------------------------------------|--------------------------------------------------------------------------------------------------------------------------------------------------------------------------|
| Perceiving emotions                   | The ability to perceive emotions in oneself and others, as well in objects, art, stories, music, and other stimuli                                            | Examinees must identify the intensity of emotion expressed in several images of faces and designs                                                                        |
| Using emotions to facilitate thinking | The ability to generate, use, and feel emotion as necessary to communicate feelings, or employ them in other cognitive processes                              | Examinees must identify specific emotions that affect one's behavior or performance on cognitive tasks                                                                   |
| Understanding emotions                | The ability to understand emotional information, how emotions combine and progress through relationship transitions and to appreciate such emotional meanings | Examinees must demonstrate an understanding of how individuals may experience several emotions simultaneously, and how some emotions, when combined, form other emotions |
| Managing emotions                     | The ability to be open to feelings, to modulate them in oneself and others so as to promote personal understanding and growth                                 | Examinees must select the most appropriate social responses to achieve desired outcomes in social situations                                                             |

| <b>eAppendix 2. Content of the Six Factor Personality Questionnaire</b> |                     |                                                                         |
|-------------------------------------------------------------------------|---------------------|-------------------------------------------------------------------------|
| <b>Broad Factor</b>                                                     | <b>Facet Scales</b> | <b>Example Facet Content</b>                                            |
| Extraversion                                                            | Affiliation         | Makes effort to win and maintain associations with people.              |
|                                                                         | Dominance           | Attempts to control environment and influence other people.             |
|                                                                         | Exhibition          | Wants to be center of attention.                                        |
| Agreeableness                                                           | Abasement           | Accepts blame and criticism even when not deserved.                     |
|                                                                         | Even-tempered       | Avoids confrontations and conflicts.                                    |
|                                                                         | Good-natured        | Is willing to concede mistakes.                                         |
| Independence                                                            | Autonomy            | Enjoys being unattached and free from obligations.                      |
|                                                                         | Individualism       | Unconcerned about reputation with others.                               |
|                                                                         | Self-reliance       | Does not seek advice and confronts problems alone.                      |
| Openness to Experience                                                  | Change              | Dislikes and avoids routine.                                            |
|                                                                         | Breadth of Interest | Interested in learning about a diversity of things.                     |
|                                                                         | Understanding       | Enjoys satisfying intellectual curiosity.                               |
| Methodicalness                                                          | Cognitive Structure | Does not like ambiguity or uncertainty in information.                  |
|                                                                         | Deliberateness      | Acts with deliberation and prudence.                                    |
|                                                                         | Order               | Dislikes and avoids clutter and lack of organization.                   |
| Industriousness                                                         | Achievement         | Maintains high standards and is willing to work toward difficult goals. |
|                                                                         | Endurance           | Perseveres and does not give up quickly on problems.                    |
|                                                                         | Seriousness         | Takes serious approach to life and work.                                |

Adapted from Jackson, Paunonen, & Tremblay, 2000.<sup>1</sup>

### **eAppendix 3. Example of Item in Which Trainee Appropriateness of Responses**

Your Program Director contacts you regarding your case logs. Apparently, your case logs are significantly lower than everyone else in your graduating class. You respond to the Program Director that the reason is quite simple: that you are the only one reporting your case numbers and roles in procedures honestly. He is very concerned that you may not graduate if you continue at your current rate- but offers no remedy other than to “fix it”. Please rate your responses, from most to least appropriate.

- A. Talk to your peers and adopt their reporting methods
- B. Break duty hours and scrub in more cases
- C. Take credit for cases in which you are not directly involved
- D. Take over the cases from the juniors on your service so you can increase your numbers
- E. Demand that the Program Director monitor your colleagues' case logs to determine if any impropriety has occurred
- F. Complain to the Program Director that self-reporting is a flawed system
- G. Ask to discuss the issue with the Program Director and the Chair of the department

## **eReference**

1. Jackson DN, Paunonen SV, Tremblay PF. Six Factor Personality Questionnaire. Port Huron, MI: Sigma Assessments Systems; 2000.
